# Supplementary material for: Integrated soil fertility management drives the effect of cover crops on GHG emissions in an irrigated field
Source: Copernicus journal article supplement (doi:10.5194/bg-2016-29), 2016-03-29
Supplement: Supplementary file [file bg-2016-29-AC1-supplement.pdf]

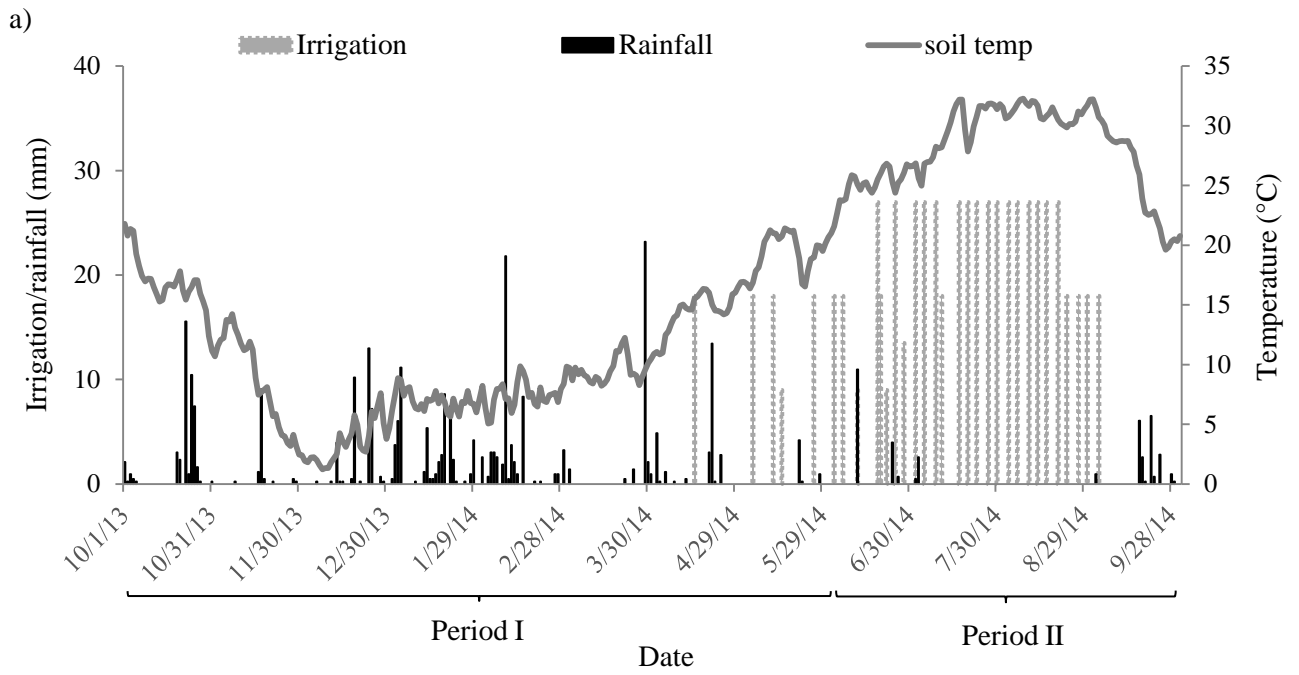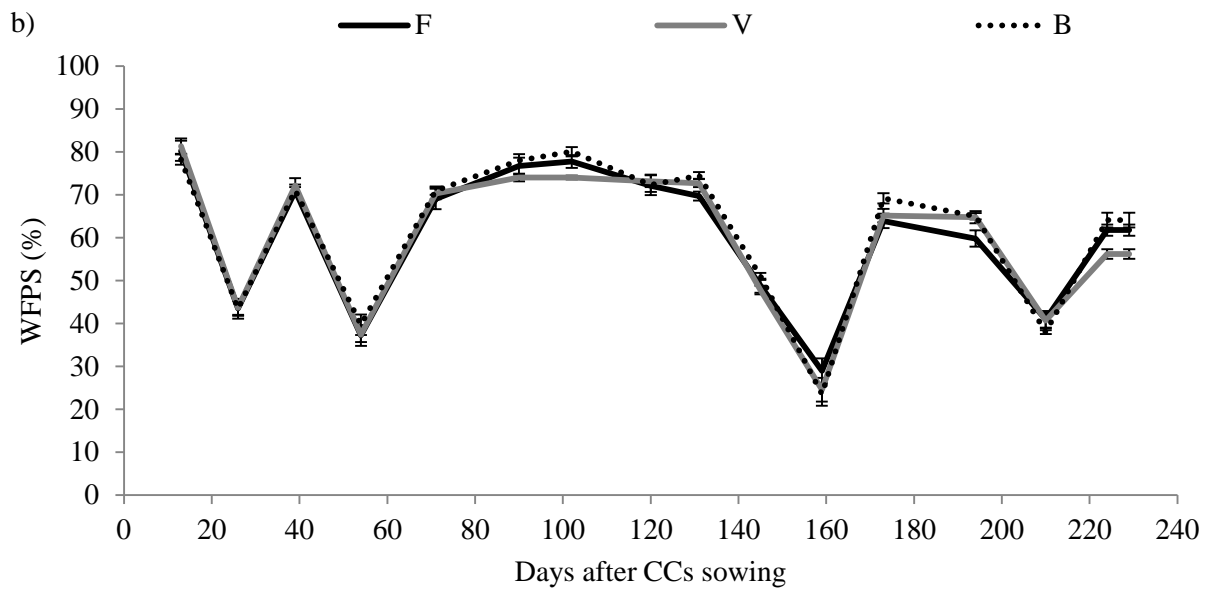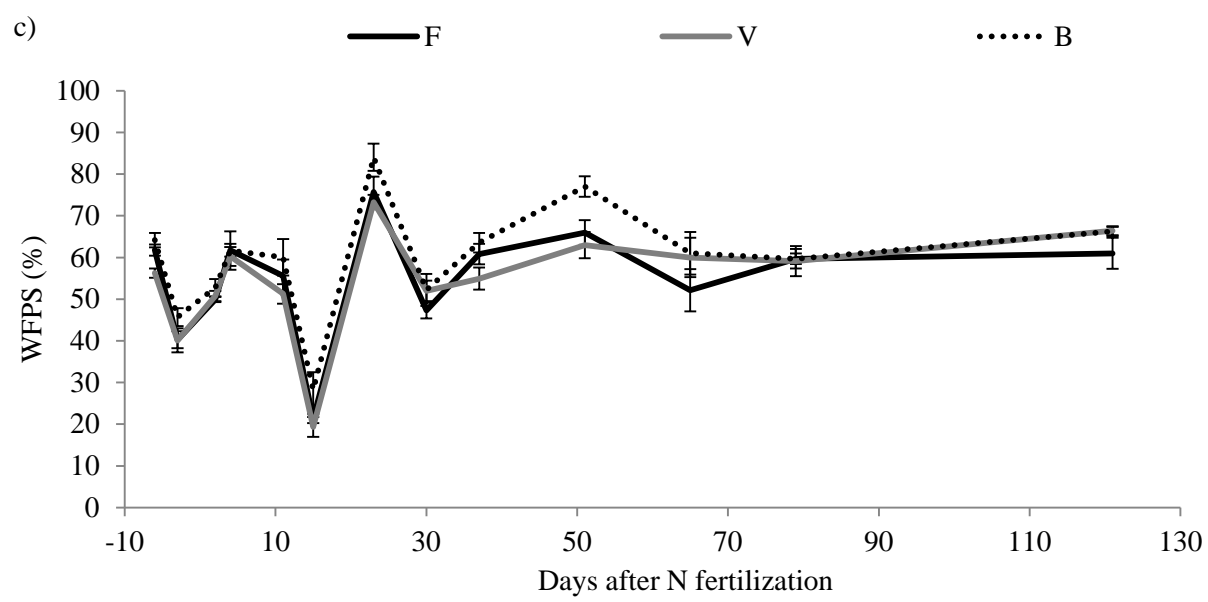

fig01

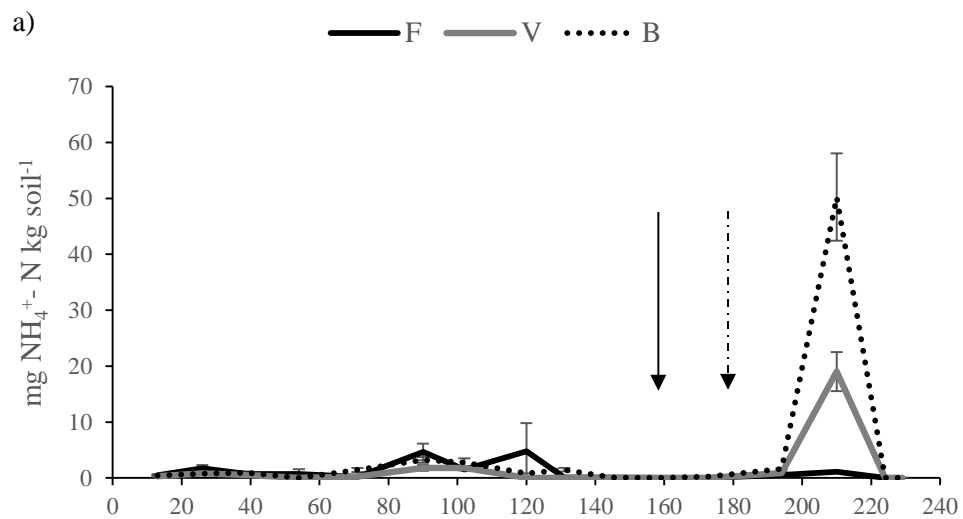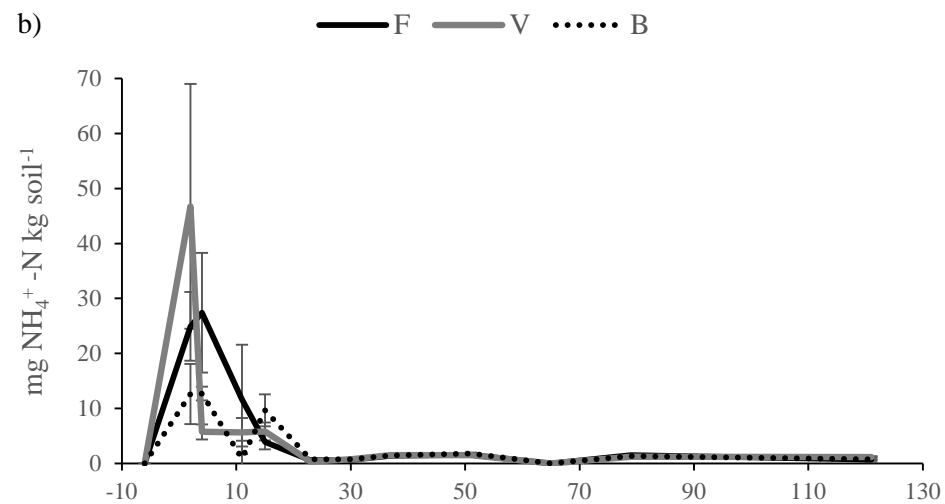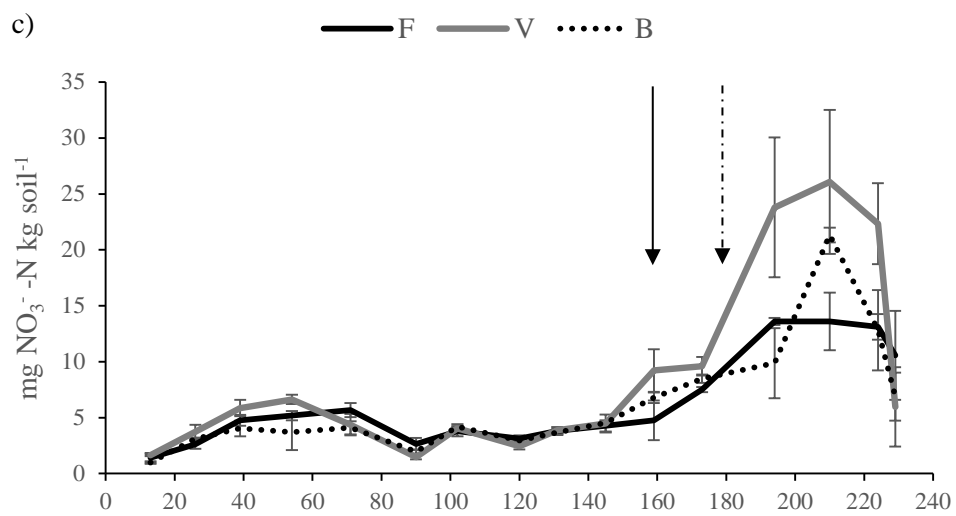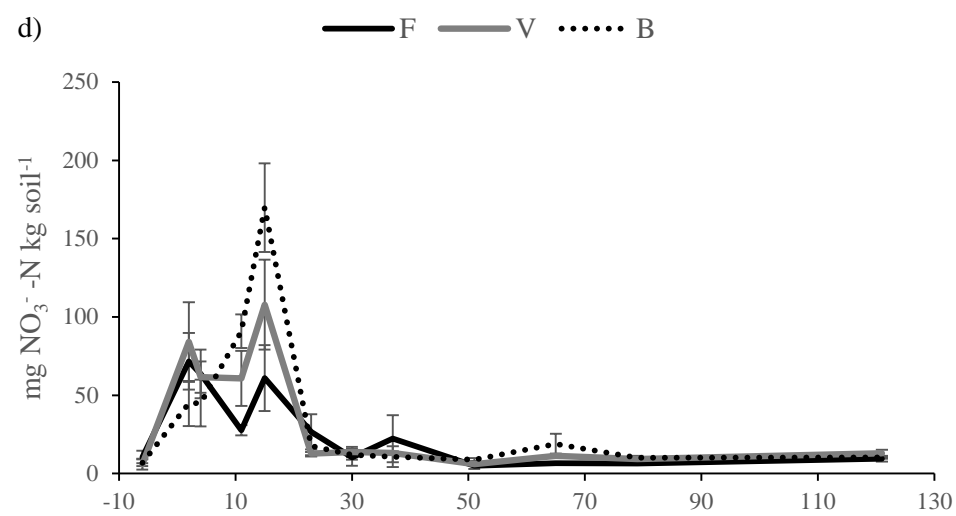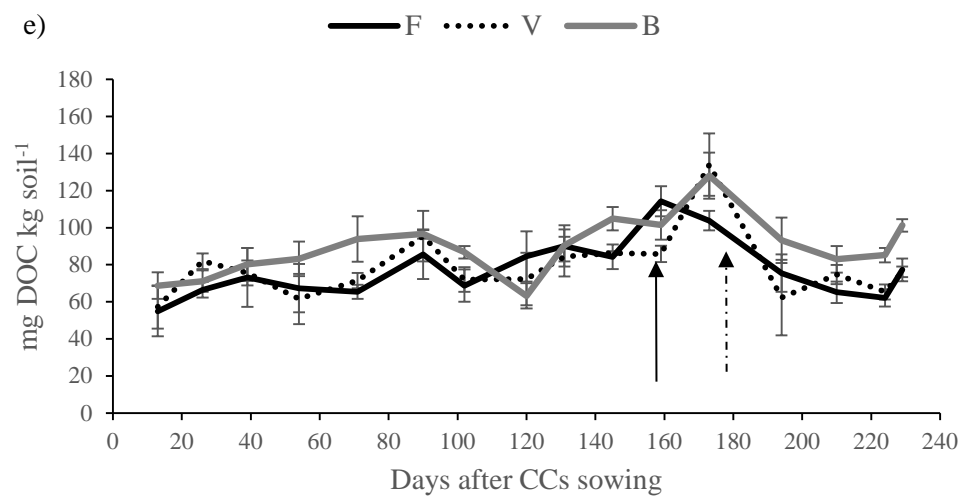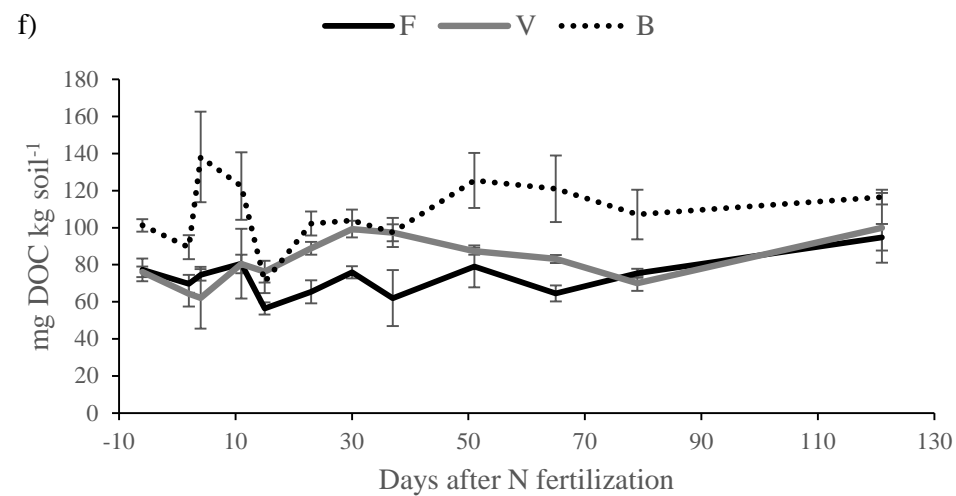

fig02

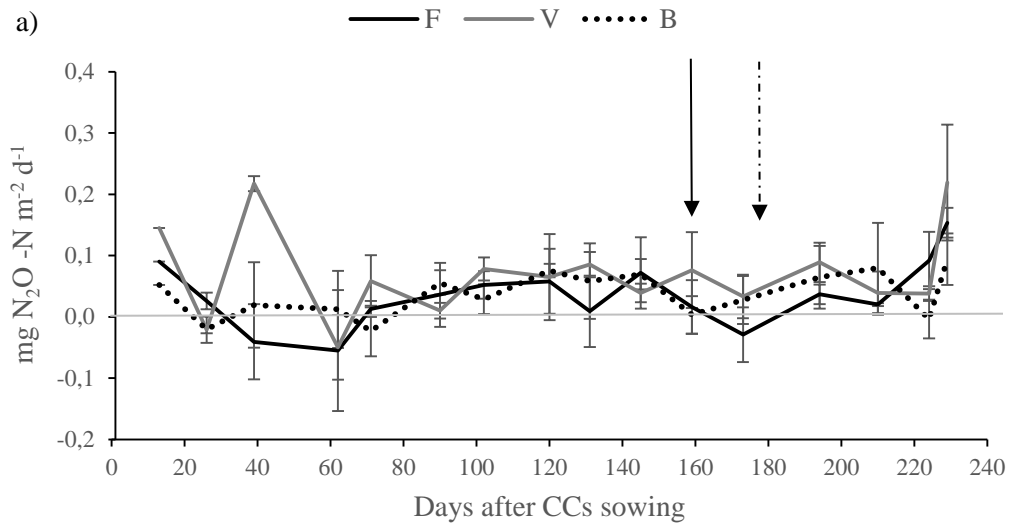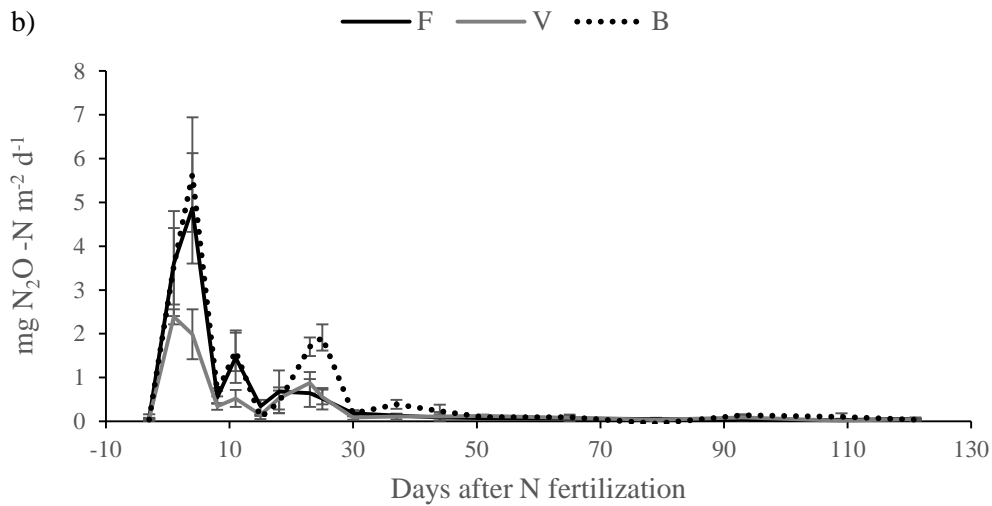

fig03

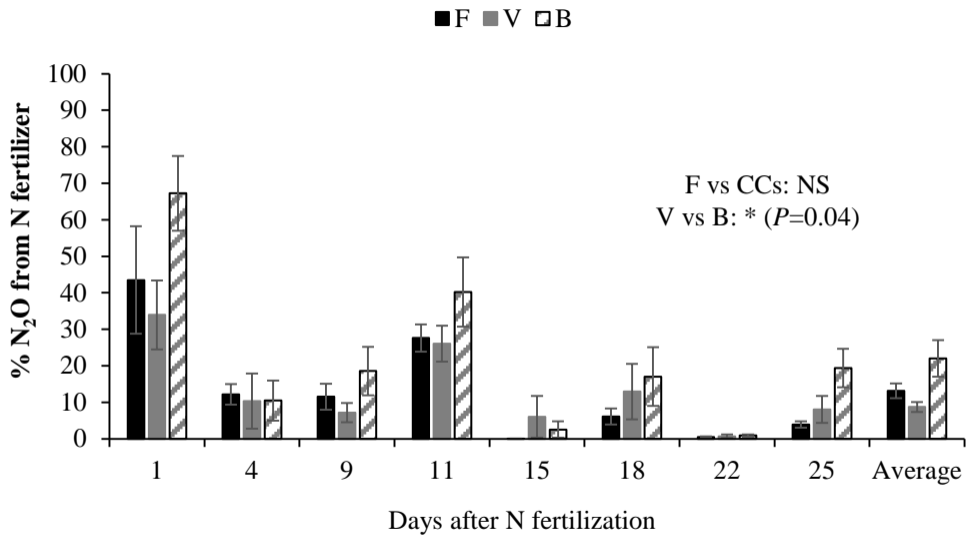

fig04
